# Supplementary material
Source: Research Square preprint supplement (doi:10.21203/rs.3.rs-9688545/v1)
Supplement: Supplementary file 1 [file 0d3f6327486f7e32d7809497.docx]

Supplementary Table S1

Risk of Bias and Quality Assessment of Studies on Alzheimer's Disease Progression through MRI.

| **Study quality** | **Appropriate Statistical analysis** | **strategi to incomplete follow up** | **Was Complete follow-up** | **Enough follow-up time** | **outcomes valid & reliable measured** | **Free of the outcome at the moment of exposure** | **Strategi to deal confounding** | **Confounding factor** | **Valid & reliable measured** | **exposures measured similarly** | **Same papulation** | **study** |
| --- | --- | --- | --- | --- | --- | --- | --- | --- | --- | --- | --- | --- |
| 6 | Y | U | U | U | Y | NA | U | Y | NA | Y | N | Contador J et al., 2021 |
| 9 | Y | NA | Y | Y | Y | NA | N | Y | Y | Y | N | Weston et al., 2016 |
| 9 | Y | NA | Y | Y | Y | NA | N | N | Y | Y | Y | Weiler et al., 2015 |
| 6 | Y | NA | Y | N | Y | N | U | U | Y | Y | Y | Mak E et al., 2015 |
| 8 | Y | NA | Y | Y | Y | N | U | N | Y | Y | Y | Adriaanse et al., 2014 |
| 8 | Y | NA | Y | Y | Y | NA | U | U | Y | U | Y | Villemagne et al., 2013 |
| 11 | Y | NA | Y | Y | Y | NA | Y | Y | Y | Y | Y | Kruger,C,E et al. |
| 4 | Y | U | U | U | Y | N | N | N | Y | Y | N | Henneman. W.J.P et al, 2009 |
